# Supplementary material for: Hypoxia due to intrapulmonary vascular dilatation in a toddler with a congenital portacaval shunt: case report
Source: Springer Nature journal article supplement (doi:10.1186/s12890-019-0788-8), 2019-02-22
Supplement: MOESM2 [file 16501460]

Previously healthy 2 year old child, antenatal echography showed mild cardiomegaly

- Current Illness:** Cyanosis for 4- months
- Physical Examination:** Oxygen saturation 74% to 85% in room air: Finger clubbing
- Diagnostic Evaluations:**
  - Chest x-ray:** increased peripheral interstitial markings with mild cardiomegaly
  - Abdominal ultrasound:** dilated inferior vena cava, with portal vein shunting into the inferior vena cava
  - Echocardiography** No structural cardiac defects, normal pulmonary pressures, positive bubble contrast study
  - Cardiac catheterization:** Significant intrapulmonary shunting  
**Portal vein- inferior vena cava portosystemic shunt**

0

8-months

2-weeks  
after closure

Transcatheter embolization of the shunt using a Vascular Plug **Complete occlusion** of the shunt was confirmed by abdominal ultrasound, echocardiogram and angiogram

Two weeks after the procedure, his oxygen saturation was 95% to 100% in room air.

4-years follow up cyanosis and finger clubbing gradually disappeared
